# Supplementary material
Source: Springer Nature journal article supplement (https://mijn.bsl.nl/resource/supplementary/13047_2010_340_MOESM3_ESM.pdf/7110542)
Supplement: MOESM3 [file 7110542]

Please mark only **ONE** BOX with a **X**

|                                                                                                                |                                                                                                                                                                                                                                 |
|----------------------------------------------------------------------------------------------------------------|---------------------------------------------------------------------------------------------------------------------------------------------------------------------------------------------------------------------------------|
| When should you re-evaluate your management of a foot ulcer that is not infected or healing?                   | <input type="checkbox"/> 1 week<br><input type="checkbox"/> 2 weeks<br><input type="checkbox"/> 1 month<br><input type="checkbox"/> 2 months<br><input type="checkbox"/> 4 months<br><input type="checkbox"/> Sundays           |
| How do you most definitively clinically determine if an ischaemic ulcer requires a Vascular Surgical referral? | <input type="checkbox"/> Look at skin<br><input type="checkbox"/> Ask patient<br><input type="checkbox"/> Palpate pulses<br><input type="checkbox"/> Toe pressures<br><input type="checkbox"/> Pole test                        |
| If your patient has >2cm Cellulitis around their foot ulcer what would you do?                                 | <input type="checkbox"/> Initiate antibiotics<br><input type="checkbox"/> Panic<br><input type="checkbox"/> Get MRI<br><input type="checkbox"/> Refer for potential admission<br><input type="checkbox"/> Dress with honey      |
| What is the most appropriate Wound Dressing for non-infected plantar Neuropathic Ulcers?                       | <input type="checkbox"/> Hydrocolloid<br><input type="checkbox"/> Foam<br><input type="checkbox"/> Film<br><input type="checkbox"/> Honey<br><input type="checkbox"/> Hydrofibre<br><input type="checkbox"/> Combine            |
| How do you measure the size of a foot ulcer according to the International group?                              | <input type="checkbox"/> Draw picture<br><input type="checkbox"/> Take photo<br><input type="checkbox"/> Measure length & width (mm <sup>2</sup> )<br><input type="checkbox"/> Pray<br><input type="checkbox"/> Ask patient     |
| How do you primarily assess the depth of a foot ulcer?                                                         | <input type="checkbox"/> Look<br><input type="checkbox"/> Fingers<br><input type="checkbox"/> X-ray<br><input type="checkbox"/> MRI<br><input type="checkbox"/> Sterile probe<br><input type="checkbox"/> Refer Endocrinologist |
| What is the most important principle to manage a non-infected Neuropathic Ulcer?                               | <input type="checkbox"/> Wound dressing<br><input type="checkbox"/> Antibiotics<br><input type="checkbox"/> Off-load pressure<br><input type="checkbox"/> Refer Vascular Surgeon                                                |
